# Supplementary material
Source: Springer Nature journal article supplement (https://www.springermedizin.de/resource/supplementary/12893_2012_307_MOESM3_ESM.pdf/9512068)

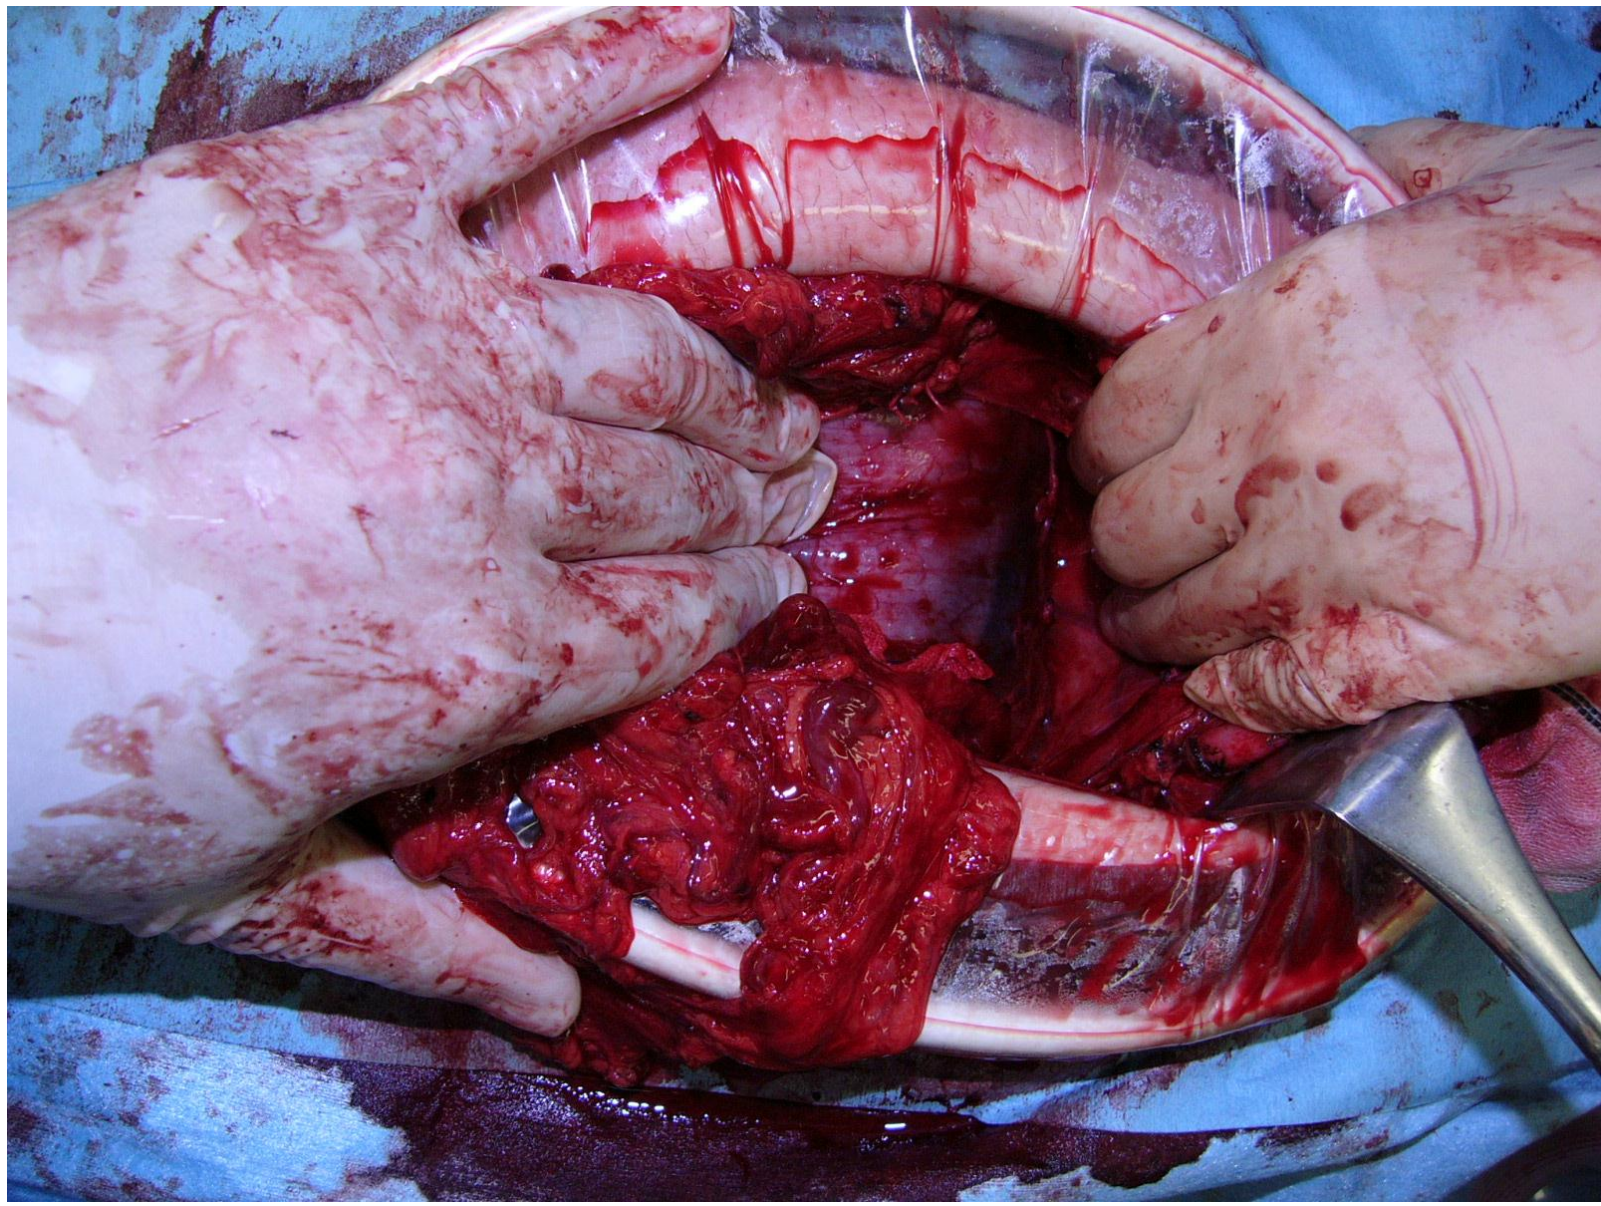

Supplement: MOESM3 [file 9512068]
